# Supplementary material
Source: publisher site journal article supplement (https://www.dovepress.com/article/423587)
Supplement: Supplementary file 1 [file get_supplementary_file.php]

Table S1: Number of children in each dataset, Breastfeeding, Measurements, and Smoking, respectively, by the total number of birth cohort in each calendar year.

| Year | Total birth cohort (n) | Coverage measurement (%) | Coverage smoking (%) | Coverage breastfeeding (%) |
| --- | --- | --- | --- | --- |
| 2000 | 83,736 | 76.20 | 26.44 | <0.01 |
| 2001 | 79,218 | 81.10 | 26.99 | <0.01 |
| 2002 | 75,962 | 84.89 | 27.50 | <0.01 |
| 2003 | 74,337 | 88.86 | 28.23 | 0.20 |
| 2004 | 73,517 | 90.33 | 27.57 | 0.51 |
| 2005 | 72,841 | 91.52 | 26.95 | 1.36 |
| 2006 | 73,640 | 92.70 | 27.50 | 3.23 |
| 2007 | 72,440 | 93.08 | 29.62 | 5.60 |
| 2008 | 73,319 | 91.20 | 29.04 | 6.79 |
| 2009 | 70,981 | 90.91 | 29.59 | 12.13 |
| 2010 | 71,248 | 92.20 | 35.26 | 24.30 |
| 2011 | 66,419 | 93.17 | 57.69 | 38.59 |
| 2012 | 65,119 | 94.07 | 72.06 | 48.05 |
| 2013 | 62,513 | 92.93 | 82.57 | 56.86 |
| 2014 | 63,116 | 91.52 | 81.96 | 64.34 |
| 2015 | 63,659 | 90.87 | 80.53 | 64.91 |
| 2016 | 66,361 | 90.08 | 78.09 | 59.87 |
| 2017 | 65,362 | 84.32 | 69.25 | 53.85 |
| 2018 | 64,721 | 80.17 | 68.57 | 52.08 |
| 2019 | 64,017 | 69.89 | 60.84 | 30.39 |

Table S2: Full description of all available variables in the Danish National Child Health Register for each of the three datasets, Breastfeeding, Measurements, and Smoking.

| Name of Dataset | Variable name | Variable description |
| --- | --- | --- |
| Breastfeeding | cprnummer | The child’s civil personal registration number |
| Breastfeeding | oprettelsesdato | Creation date of the form in the electronic reporting systems (SEI) |
| Breastfeeding | varighed_dage | Duration of full breastfeeding |
| Breastfeeding | datostoppet | Date of cessation of full breastfeeding |
| Breastfeeding | foedselsdato | The child’s date of birth |
| Breastfeeding | koenskode | The child’s sex, code |
| Breastfeeding | koensnavn | The child’s sex, description |
| Breastfeeding | kommunekode | The child's municipality of residence, code |
| Breastfeeding | kommunenavn | The child's municipality of residence, description |
| Breastfeeding | regionskode | The child's region of residence, code |
| Breastfeeding | regionsnavn | The child's region of residence, description |
| Smoking | cprnummer | The child’s civil personal registration number |
| Smoking | oprettelsesdato | Creation date of the form in the electronic reporting systems (SEI) |
| Smoking | passivrygningkode | Exposure to passive smoking, code |
| Smoking | passivrygningnavn | Exposure to passive smoking, description |
| Smoking | foedselsdato | The child’s date of birth |
| Smoking | koenskode | The child’s sex, code |
| Smoking | koensnavn | The child’s sex, description |
| Smoking | kommunekode | The child's municipality of residence, code |
| Smoking | kommunenavn | The child's municipality of residence, description |
| Smoking | regionskode | The child's region of residence, code |
| Smoking | regionsnavn | The child's region of residence, description |
| Measurements | cprnummer | The child’s civil personal registration number |
| Measurements | oprettelsesdato | Creation date of the form in the electronic reporting systems (SEI) |
| Measurements | dato | Date of the measurement |
| Measurements | skolegruppekode | Measurement type, code (1/2/0) |
| Measurements | skolegruppenavn | Measurement type, description (Start of compulsory education/end of compulsory education/other) |
| Measurements | skolekode | The school where measurement was taken, code |
| Measurements | skolenavn | The school where measurement was taken, description |
| Measurements | postdistrikt | The school’s postal code |
| Measurements | foedselsdato | The child’s date of birth |
| Measurements | alder_aar | The child's age in years |
| Measurements | alder_maaned | The child's age in months |
| Measurements | koenskode | The child’s sex, code |
| Measurements | koensnavn | The child’s sex, description |
| Measurements | vaegt_gram | The child’s weight in grams |
| Measurements | hoejde_cm | The child’s height in centimeter |
| Measurements | bmikategorikode | The child's Body mass index group, code |
| Measurements | bmikategorinavn | The child's Body mass index group, description |
| Measurements | kommunekode | The child's municipality of residence, code |
| Measurements | kommunenavn | The child's municipality of residence, description |
| Measurements | regionskode | The child's region of residence, code |
| Measurements | regionsnavn | The child's region of residence, description |
